# Supplementary material for: Comprehensive Genomic Profile of Heterogeneous Long Follow-Up Triple-Negative Breast Cancer and Its Clinical Characteristics Shows DNA Repair Deficiency Has Better Prognostic
Source: PubMed Central journal article supplement (PMC7699204; doi:10.3390/genes11111367), 2020-11-19
Supplement: genes-11-01367-s001.pdf [file genes-11-01367-s001.pdf]

1 **Supplementary material**

2 *TABLES*

3 **Supplementary Table 1.** Chemotherapy treatment by patient.

| ID       | Chemotherapy status | Neoadjuvant chemotherapy    | Adjuvant chemotherapy        | Palliative treatment                 |
|----------|---------------------|-----------------------------|------------------------------|--------------------------------------|
| F1_2     | CCT                 | FAC+Paclitaxel+RT           | NA                           | NA                                   |
| F101_313 | CCT                 | ADR+Paclitaxel+RT           | Capecitabine                 | NA                                   |
| F102_317 | CCT                 | FAC+Paclitaxel+RT           | Capecitabine                 | NA                                   |
| F11_33   | CCT                 | NA                          | CDDP+Paclitaxel+GMZ+CBP      | NA                                   |
| F2_5     | CCT                 | ADR+FOS+RT+Tamoxifen        | Paclitaxel+CDDP+CBP          | Docetaxel/GMZ                        |
| F21_75   | CCT                 | FAC+Paclitaxel+RT           | CBP                          | Capecitabine                         |
| F23_81   | ChPLA               | ADR+CDDP+Paclitaxel         | RT+Capecitabine              | NA                                   |
| F27_97   | CCT                 | FAC+Paclitaxel+RT           | NA                           | Capecitabine                         |
| F29_105  | ChPLA               | FAC+CDDP+Paclitaxel+GMZ+RT  | NA                           | CBP+Docetaxel+Capecitabine           |
| F3_8     | CCT                 | FAC+Paclitaxel+Capecitabine | Capecitabine+CBP+Navelbine   | NA                                   |
| F31_110  | CCT                 | FAC+Paclitaxel              | RT                           | NA                                   |
| F36_122  | ChPLA               | FAC+CDDP+Paclitaxel         | RT                           | NA                                   |
| F39_133  | ChPLA               | CDDP+Paclitaxel             | RT+CDDP+GMZ+Capecitabine+CBP | NA                                   |
| F42_147  | CCT                 | FAC+Paclitaxel              | CDDP+Navelbine               | GMZ+CBP                              |
| F44_153  | CCT                 | FAC+Paclitaxel              | RT+CDDP+GMZ                  | NA                                   |
| F49_165  | ChPLA               | CDDP+ADR+Paclitaxel         | RT+Capecitabine              | NA                                   |
| F50_167  | ChPLA               | CDDP+DOXO+Paclitaxel        | RT+Capecitabine              | NA                                   |
| F55_181  | ChPLA               | FAC+Paclitaxel+CDDP         | NA                           | NA                                   |
| F63_205  | CCT                 | FAC+Paclitaxel              | NA                           | NA                                   |
| F64_206  | CCT                 | FAC+Paclitaxel+RT           | Navelbine                    | CDDP+GMZ                             |
| F65_208  | CCT                 | FAC+Taxol                   | Capecitabine                 | CBP+Docetaxel                        |
| F67_215  | CCT                 | FAC+Paclitaxel+GMZ+RT       | NA                           | Capecitabine+Zometa+Xeloda+Navelbine |
| F77_245  | ChPLA               | FAC+Paclitaxel+CDDP+GMZ+RT  | Capecitabine                 | NA                                   |

|         |       |                        |                        |                      |
|---------|-------|------------------------|------------------------|----------------------|
| F82_248 | ChPLA | FAC+Paclitaxel+CDDP    | RT                     | NA                   |
| F85_261 | CCT   | FAC+Paclitaxel         | RT                     | Capecitabine+CBP+GMZ |
| F9_27   | CCT   | FAC+Paclitaxel+GMZ+RT  | Capecitabine+Navelbine | NA                   |
| F91_276 | CCT   | FAC+Paclitaxel         | RT                     | NA                   |
| F92_281 | ChPLA | CDDP+ADR+Paclitaxel+RT | NA                     | NA                   |
| F97_299 | CCT   | FAC+Paclitaxel+RT      | Capecitabine           | NA                   |

4

5

Abreviations: CCT: conventional chemotherapy, ChPLA: conventional chemotherapy plus platinum salt derivatives plus platinum salts, FAC: fluorouracil/adramycin/citoxan, RT: radiotherapy, ADR: adramycin, GMZ: gemzar, CBP: carboplatin, FOS: cyclophosphamide, CDDP: cisplatin, DOXO: doxorubicin, NA: not available.

6

7

8

9

10

11 **Supplementary table 2.** Driver mutations by patient.

| ID       | gene          | Protein     | HotSpot | gene_role             |
|----------|---------------|-------------|---------|-----------------------|
| F1_2     | <i>NF1</i>    | splicing    | No      | Tumor suppressor gene |
| F101_313 | <i>BRCA1</i>  | G1077Afs*8  | No      | Tumor suppressor gene |
| F102_317 | <i>CREBBP</i> | R1446C      | Yes     | Tumor suppressor gene |
| F102_317 | <i>TP53</i>   | R213*       | No      | Tumor suppressor gene |
| F2_5     | <i>ERBB2</i>  | R849Q       | No      | Oncogene              |
| F2_5     | <i>HRAS</i>   | G12D        | No      | Oncogene              |
| F2_5     | <i>INPPL1</i> | G1759T      | No      | Tumor suppressor gene |
| F2_5     | <i>PIK3CA</i> | E545K       | No      | Oncogene              |
| F2_5     | <i>GNAI2</i>  | G157T       | No      | ambiguous             |
| F23_81   | <i>TP53</i>   | Y234C       | Yes     | Tumor suppressor gene |
| F27_97   | <i>PIK3CA</i> | H1047R      | Yes     | Oncogene              |
| F27_97   | <i>BRCA1</i>  | E597K       | No      | Tumor suppressor gene |
| F27_97   | <i>TP53</i>   | G244D       | Yes     | Tumor suppressor gene |
| F29_105  | <i>STAT4</i>  | C718T       | No      | ambiguous             |
| F29_105  | <i>GNA11</i>  | L273F       | No      | Oncogene              |
| F29_105  | <i>TP53</i>   | R248W       | Yes     | Tumor suppressor gene |
| F3_8     | <i>CDKN1B</i> | F87S        | No      | Tumor suppressor gene |
| F3_8     | <i>CD274</i>  | G301C       | No      | Oncogene              |
| F31_110  | <i>BRCA2</i>  | K2750Dfs*13 | No      | Tumor suppressor gene |
| F31_110  | <i>TP53</i>   | R249S       | Yes     | Tumor suppressor gene |
| F39_133  | <i>CIITA</i>  | G1660C      | No      | Oncogene              |
| F39_133  | <i>PTEN</i>   | D92H        | Yes     | Tumor suppressor gene |
| F39_133  | <i>TP53</i>   | C238R       | Yes     | Tumor suppressor gene |
| F42_147  | <i>TAGAP</i>  | G1520C      | No      | ambiguous             |
| F44_153  | <i>TP53</i>   | H168P       | Yes     | Tumor suppressor gene |
| F49_165  | <i>BRCA1</i>  | E597K       | No      | Tumor suppressor gene |
| F50_167  | <i>BRCA2</i>  | Q1089Sfs*10 | No      | Tumor suppressor gene |

|         |               |           |     |                       |
|---------|---------------|-----------|-----|-----------------------|
| F50_167 | <i>CIITA</i>  | C1603A    | No  | Oncogene              |
| F50_167 | <i>MSH6</i>   | R3L       | No  | Tumor suppressor gene |
| F50_167 | <i>PDCD1</i>  | G349T     | No  | ambiguous             |
| F50_167 | <i>XPC</i>    | D586Y     | No  | Tumor suppressor gene |
| F50_167 | <i>TP53</i>   | Y220C     | Yes | Tumor suppressor gene |
| F63_205 | <i>TP53</i>   | Splicing  | No  | Tumor suppressor gene |
| F65_208 | <i>ACTB</i>   | C899T     | No  | Oncogene              |
| F65_208 | <i>ATF2</i>   | C850T     | No  | ambiguous             |
| F65_208 | <i>TP53</i>   | Y163C     | Yes | Tumor suppressor gene |
| F67_215 | <i>TLR6</i>   | N235delN  | No  | ambiguous             |
| F85_261 | <i>TP53</i>   | C242Afs*5 | No  | Tumor suppressor gene |
| F9_27   | <i>CDKN1B</i> | G25T      | No  | Tumor suppressor gene |
| F9_27   | <i>NOTCH1</i> | S2516F    | No  | ambiguous             |
| F9_27   | <i>FANCD2</i> | P1224H    | No  | Tumor suppressor gene |
| F9_27   | <i>FN1</i>    | A621T     | No  | Tumor suppressor gene |
| F9_27   | <i>PIK3CD</i> | G319T     | No  | Oncogene              |
| F91_276 | <i>ERCC6</i>  | W1486C    | No  | ambiguous             |
| F91_276 | <i>PLCG1</i>  | C262T     | No  | Oncogene              |
| F92_281 | <i>PIK3R1</i> | I82Sfs*32 | No  | Tumor suppressor gene |
| F92_281 | <i>BRCA1</i>  | C61Y      | No  | Tumor suppressor gene |
| F92_281 | <i>TAF1</i>   | T752C     | No  | Oncogene              |
| F97_299 | <i>PTEN</i>   | R233*     | No  | Tumor suppressor gene |
| F97_299 | <i>TP53</i>   | A159V     | Yes | Tumor suppressor gene |

12

13

Supplementary table 3. Potential targeted treatments.

| ID      | Sample alteration       | Drug                                                  | Gene tested/tumor type | Evidence                     | Source                          |
|---------|-------------------------|-------------------------------------------------------|------------------------|------------------------------|---------------------------------|
| F27_97  | BRCA1 MUT (E597K)       | PARP inhibitors (Olaparib,etc)                        | BRCA                   | Early trials                 | PMID:20609467;PMID:25366685     |
| F27_97  | BRCA1 MUT (E597K)       | Platinum Agent (Chemotherapy)                         | BRCA                   | Early trials                 | PMID:25847936                   |
| F27_97  | BRCA1 MUT (E597K)       | Veliparib + Cisplatin (PARP inhibitor + Chemotherapy) | BRCA                   | Early trials                 | PMID:26801247                   |
| F27_97  | PIK3CA MUT (H1047R)     | AKT inhibitors                                        | BRCA                   | Early trials                 | ASCO 2015 (abstr 2500)          |
| F27_97  | PIK3CA MUT (H1047R)     | PIK3CA inhibitors                                     | BRCA                   | Early trials                 | PMID:28331003                   |
| F2_5    | HRAS MUT (G12D)         | Tipifarnib (Farnesyltransferase inhibitor)            | Any cancer type        | Early trials                 | NCT02383927                     |
| F2_5    | HRAS MUT (G12D)         | Tipifarnib (Farnesyltransferase inhibitor)            | Any cancer type        | Early trials                 | NCT02383927                     |
| F2_5    | PIK3CA MUT (E545K)      | AKT inhibitors                                        | BRCA                   | Early trials                 | ASCO 2015 (abstr 2500)          |
| F2_5    | PIK3CA MUT (E545K)      | PIK3CA inhibitors                                     | BRCA                   | Early trials                 | PMID:28331003                   |
| F3_8    | CDKN1B MUT (F87S)       | CDK2/4 inhibitors                                     | Any cancer type        | Pre-clinical<br>Early trials | PMID:22471707<br>PMID: 30543440 |
| F50_167 | BRCA2 MUT (Q1089Sfs*10) | PARP inhibitors (Olaparib,etc)                        | BRCA                   | Early trials                 | PMID:20609467                   |
| F50_167 | BRCA2 MUT (Q1089Sfs*10) | Platinum Agent (Chemotherapy)                         | BRCA                   | Early trials                 | PMID:25847936                   |
| F50_167 | BRCA2 MUT (Q1089Sfs*10) | Veliparib + Cisplatin (PARP inhibitor + Chemotherapy) | BRCA                   | Early trials                 | PMID:26801247                   |
| F31_110 | BRCA2 MUT (K2750Dfs*13) | PARP inhibitors (Olaparib,etc)                        | BRCA                   | Early trials                 | PMID:20609467                   |
| F31_110 | BRCA2 MUT (K2750Dfs*13) | Platinum Agent (Chemotherapy)                         | BRCA                   | Early trials                 | PMID:25847936                   |
| F31_110 | BRCA2 MUT (K2750Dfs*13) | Veliparib + Cisplatin (PARP inhibitor + Chemotherapy) | BRCA                   | Early trials                 | PMID:26801247                   |

|          |                        |                                                       |                 |              |                                 |
|----------|------------------------|-------------------------------------------------------|-----------------|--------------|---------------------------------|
| F101_313 | BRCA1 MUT (G1077Afs*8) | PARP inhibitors (Olaparib,etc)                        | BRCA            | Early trials | PMID:20609467;P<br>MID:25366685 |
| F101_313 | BRCA1 MUT (G1077Afs*8) | Platinum Agent (Chemotherapy)                         | BRCA            | Early trials | PMID:25847936                   |
| F101_313 | BRCA1 MUT (G1077Afs*8) | Veliparib + Cisplatin (PARP inhibitor + Chemotherapy) | BRCA            | Early trials | PMID:26801247                   |
| F92_281  | BRCA1 MUT (C61Y)       | PARP inhibitors (Olaparib,etc)                        | BRCA            | Early trials | PMID:20609467;P<br>MID:25366685 |
| F92_281  | BRCA1 MUT (C61Y)       | Platinum Agent (Chemotherapy)                         | BRCA            | Early trials | PMID:25847936                   |
| F92_281  | BRCA1 MUT (C61Y)       | Veliparib + Cisplatin (PARP inhibitor + Chemotherapy) | BRCA            | Early trials | PMID:26801247                   |
| F9_27    | CDKN1B MUT (G9W)       | CDK2/4 inhibitors                                     | Any cancer type | Pre-clinical | PMID:22471707                   |
| F49_165  | BRCA1 MUT (E597K)      | PARP inhibitors (Olaparib,etc)                        | BRCA            | Early trials | PMID:20609467;P<br>MID:25366685 |
| F49_165  | BRCA1 MUT (E597K)      | Platinum Agent (Chemotherapy)                         | BRCA            | Early trials | PMID:25847936                   |
| F49_165  | BRCA1 MUT (E597K)      | Veliparib + Cisplatin (PARP inhibitor + Chemotherapy) | BRCA            | Early trials | PMID:26801247                   |
| F97_299  | PTEN MUT (R233*)       | ATM inhibitors                                        | BRCA            | Pre-clinical | PMID:27397505                   |
| F97_299  | PTEN MUT (R233*)       | Sirolimus (MTOR inhibitor)                            | Any cancer type | Early trials | ASCO 2013 (abstr 2532)          |
| F39_133  | PTEN MUT (D92H)        | ATM inhibitors                                        | BRCA            | Pre-clinical | PMID:27397505                   |
| F39_133  | PTEN MUT (D92H)        | Sirolimus (MTOR inhibitor)                            | Any cancer type | Early trials | ASCO 2013 (abstr 2532)          |

16 *Supplementary figures*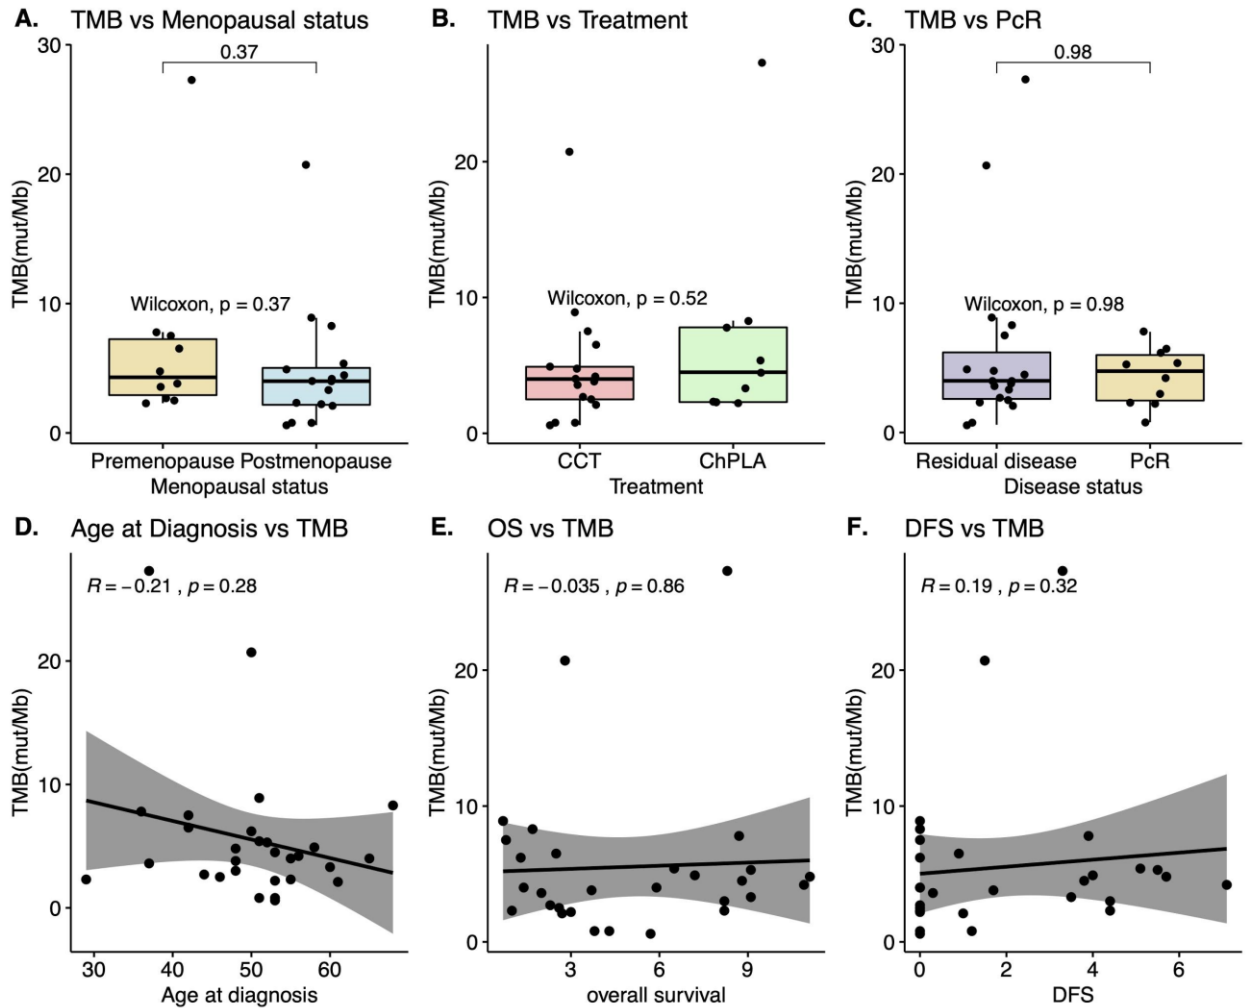

17

18

19

20

**Supplementary figure 1.** Association between clinical outcome and TMB. All the figures show the associations between the TMB and the clinical variables analyzed beginning with A. menopausal status. B. type of treatment C. PcR, D. Age at diagnosis, E. Os and F. DFS.

21

A.

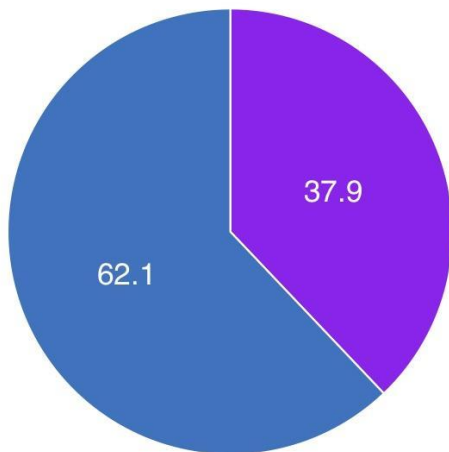

B.

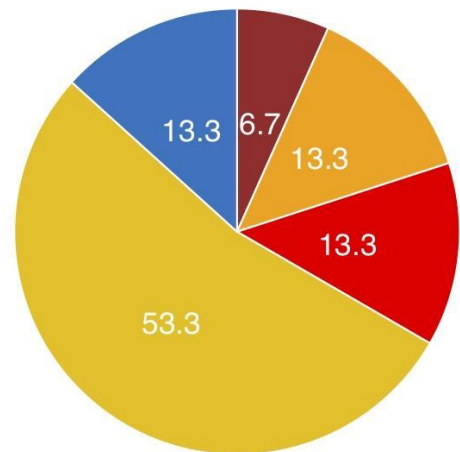

■ absent ■ available

■ iCDK2\_4 ■ iPARP ■ iPI3K ■ Sirolimus ■ Tipifarnib

22

23

24

**Supplementary figure 2.** Targeted treatments A. percentage of patients with available targeted treatments and B. Percentage of the type of treatments available.

25



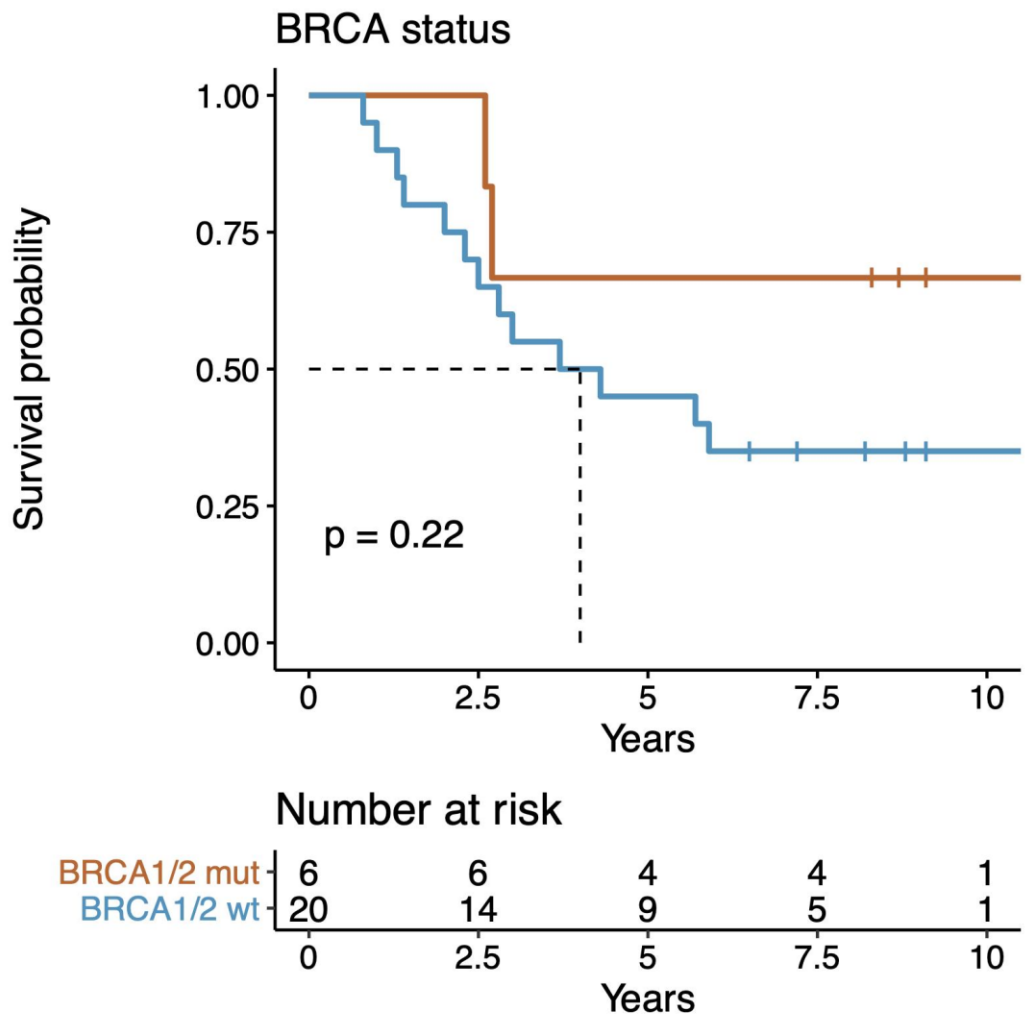

26

27

28

**Supplementary figure 3.** Overall survival as a function of *BRCA1/2* status. BRCA mutation showed a trend of higher OS.



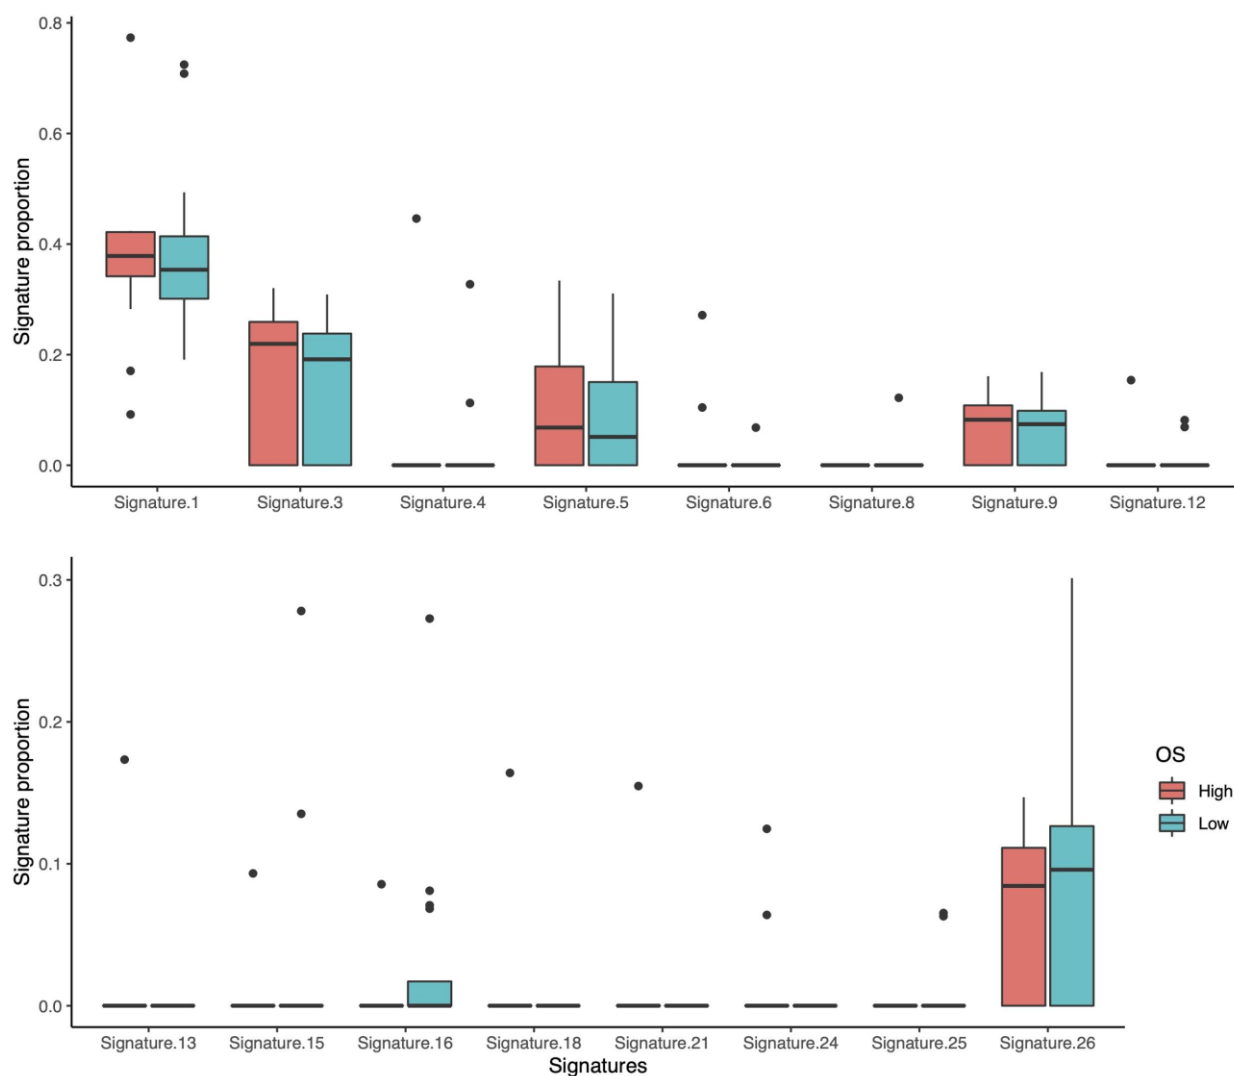

37

38

39

**Supplementary figure 5.** Comparison between the OS status (high and low) according to the signature proportion.

40

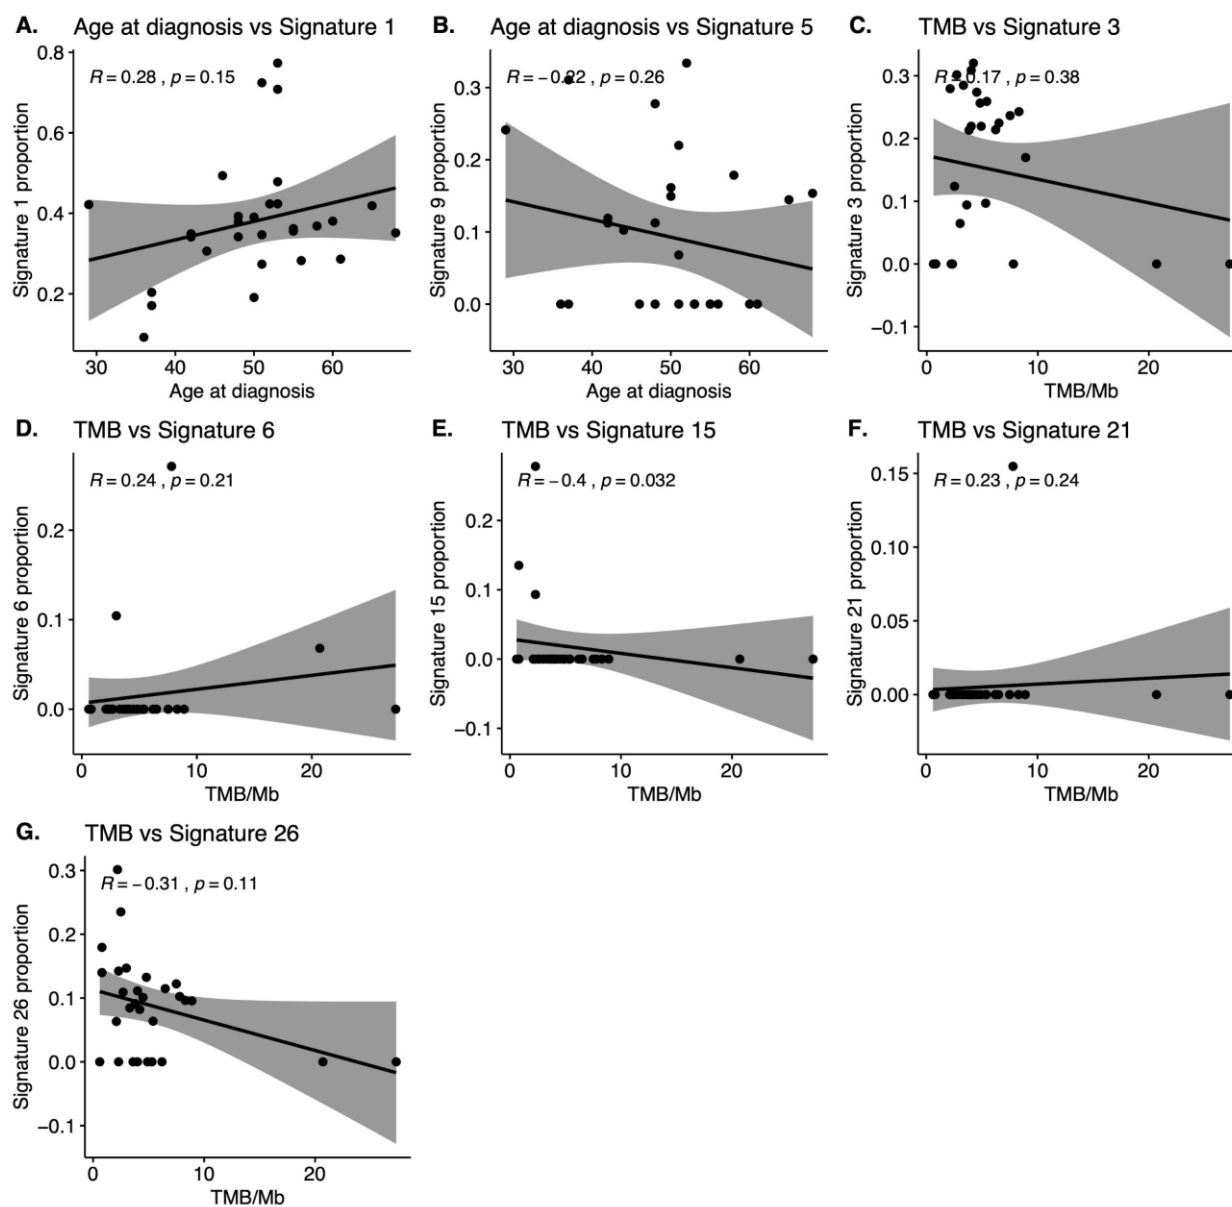

41

42

43 **Supplementary figure 6.** Linear correlation between signatures proportions with higher frequency in

44 samples and clinical and molecular variables. Age at diagnosis vs A. signature 1 proportion and B.

45 Signature 9 proportion. TMB vs C. signature 3, D. signature 6, E. signature 15, F. signature 21 and G.

signature 26 proportion.

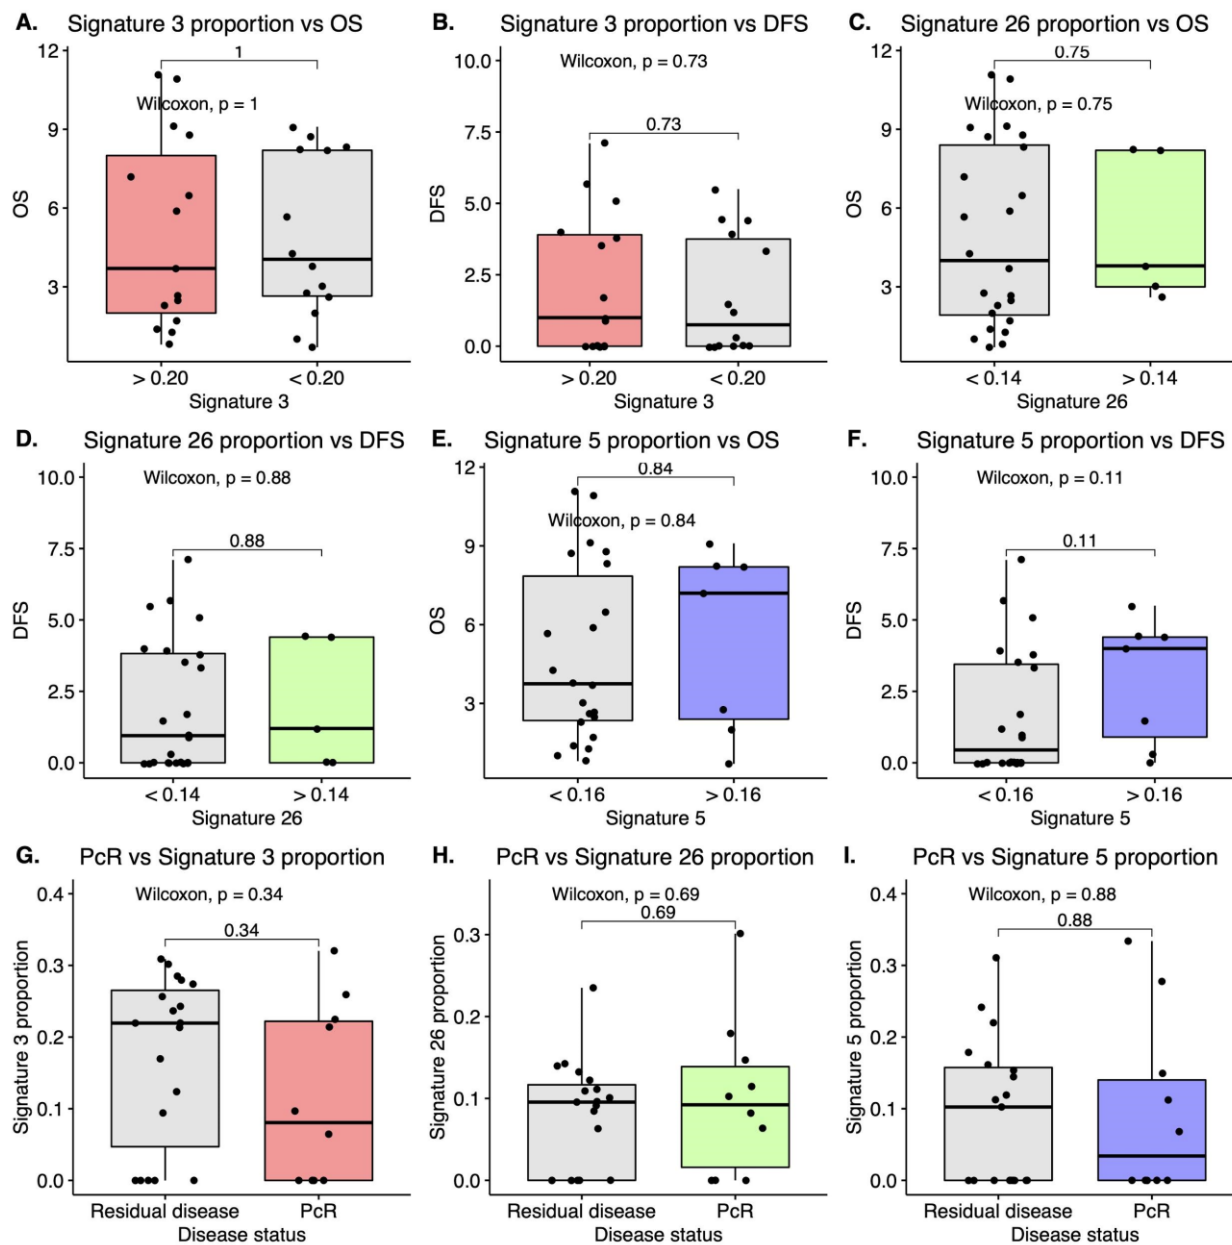

46

47

48

49

50

51

**Supplementary figure 7.** Association between threshold proportion in signatures according to the groups and the clinical outcome. OS and A. signature 3, C. signature 5 and E. signature 6. DFS and B. signature 3, D. signature 5 and F. signature 26. Red box indicated group A, green group B and blue group C; the gray boxes depicts the other two groups. The cutoffs of the proportions for each signature was selected by the threshold that divides each group.

52

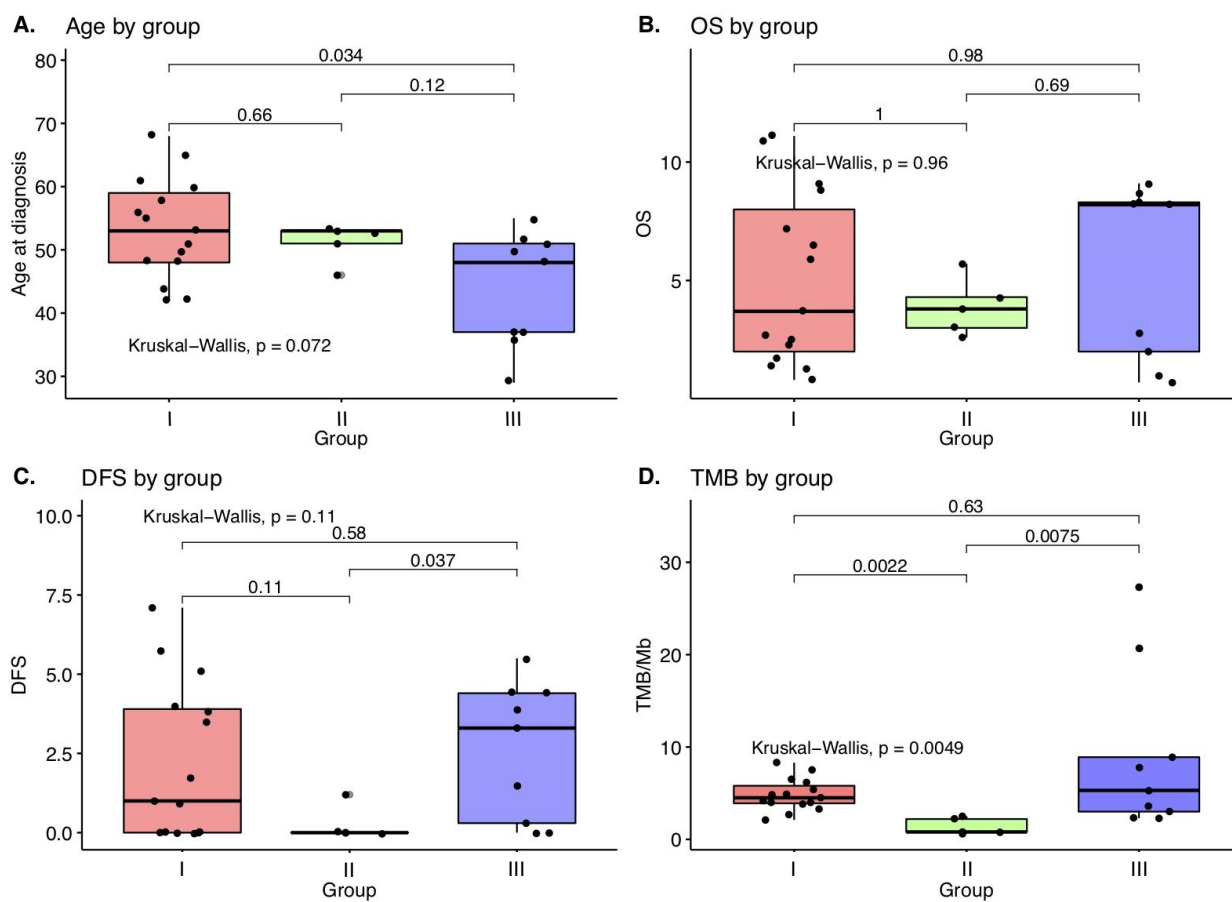

53

54

55

**Supplementary figure 8.** Differences between groups according to clinical (A, age at diagnosis; B, OS; C, DFS) and molecular outcome (D, TMB).

56

57

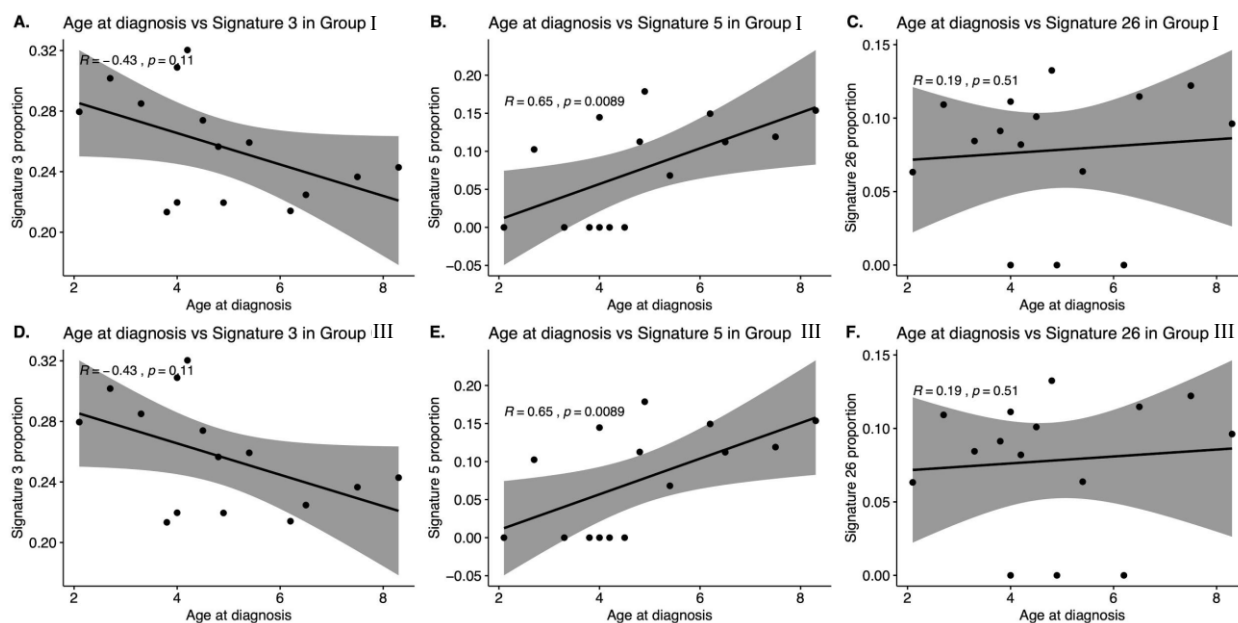

58

59

60

**Supplementary figure 9.** Linear correlation between age at diagnosis and signatures 3, 5, and 26 proportion according to signature groups I (A - C) and III (D - F).
